# Supplementary material for: Simple aliovalent cation substitution to induce strong optical anisotropy enhancement in a rare thioantimonate(v) family
Source: Royal Society of Chemistry journal article supplement (doi:10.1039/d4qi02280g), 2024-01-01
Supplement: d4qi02280g1.pdf [file d4qi02280g1.pdf]

## Supplementary Information

### **Simple Aliovalent Cation Substitution to Induce Strong Optical Anisotropy Enhancement in Rare Thioantimonates (V) Family**

Qixian Ren<sup>ab</sup>, Wangfei Che<sup>b</sup>, Mengmen Chen<sup>b</sup>, Chen Cui<sup>\*b</sup>, Yabo Wu<sup>\*b</sup> and Zhi Su<sup>\*a</sup>

[a] College of Chemistry and Chemical Engineering, Xinjiang Normal University, Urumqi, 830054, Xinjiang, PR China. E-mail: suzhixj@163.com

[b] Research Center for Crystal Materials; State Key Laboratory of Functional Materials and Devices for Special Environmental Conditions; Xinjiang Key Laboratory of Functional Crystal Materials; Xinjiang Technical Institute of Physics and Chemistry, Chinese Academy of Sciences, 40-1 South Beijing Road, Urumqi 830011, China. E-mail: wyb@ms.xjb.ac.cn; cuichen@ms.xjb.ac.cn

**Table S1.** Crystal data and structure refinement for Cs<sub>4</sub>BaSb<sub>2</sub>Se<sub>8</sub> and Rb<sub>4</sub>BaSb<sub>2</sub>Se<sub>8</sub> (293K).

| Empirical formula                                                | Cs <sub>4</sub> BaSb <sub>2</sub> Se <sub>8</sub>                            | Rb <sub>4</sub> BaSb <sub>2</sub> Se <sub>8</sub>                            |
|------------------------------------------------------------------|------------------------------------------------------------------------------|------------------------------------------------------------------------------|
| Formula weight (Da)                                              | 1544.16                                                                      | 1354.40                                                                      |
| Temperature (K)                                                  | 293                                                                          | 293                                                                          |
| Crystal system                                                   | Orthorhombic                                                                 | Orthorhombic                                                                 |
| Space group                                                      | <i>Ibam</i>                                                                  | <i>Ibam</i>                                                                  |
| <i>a</i> (Å)                                                     | 20.2919(12)                                                                  | 20.1877(10)                                                                  |
| <i>b</i> (Å)                                                     | 9.9957(6)                                                                    | 9.7124(4)                                                                    |
| <i>c</i> (Å)                                                     | 11.0708(6)                                                                   | 10.7820(5)                                                                   |
| $\alpha$ (°)                                                     | 90                                                                           | 90                                                                           |
| $\beta$ (°)                                                      | 90                                                                           | 90                                                                           |
| $\gamma$ (°)                                                     | 90                                                                           | 90                                                                           |
| Volume (Å <sup>3</sup> )                                         | 2245.5(2)                                                                    | 2114.04(17)                                                                  |
| <i>Z</i>                                                         | 4                                                                            | 4                                                                            |
| Density (calc.) (g/cm <sup>3</sup> )                             | 4.568                                                                        | 4.255                                                                        |
| Absorption coefficient (mm <sup>-1</sup> )                       | 23.458                                                                       | 27.279                                                                       |
| <i>F</i> (000)                                                   | 2600.0                                                                       | 2312.0                                                                       |
| Completeness to $\theta$ (%)                                     | 100                                                                          | 99.4                                                                         |
| Theta range for data collection                                  | 4.014 to 54.984                                                              | 6.942 to 54.958                                                              |
| Index ranges                                                     | -26 ≤ <i>h</i> ≤ 26, -12 ≤ <i>k</i> ≤ 12, -14 ≤ <i>l</i> ≤ 14                | -26 ≤ <i>h</i> ≤ 26, -10 ≤ <i>k</i> ≤ 12, -14 ≤ <i>l</i> ≤ 13                |
| Reflections collected                                            | 26206                                                                        | 11916                                                                        |
| Independent reflections                                          | 1364 [ <i>R</i> <sub>int</sub> = 0.0654, <i>R</i> <sub>sigma</sub> = 0.0228] | 1270 [ <i>R</i> <sub>int</sub> = 0.0490, <i>R</i> <sub>sigma</sub> = 0.0259] |
| Data / restraints / parameters                                   | 1364 / 0 / 43                                                                | 1270 / 0 / 43                                                                |
| Goodness-of-fit on <i>F</i> <sup>2</sup>                         | 0.959                                                                        | 1.113                                                                        |
| Final <i>R</i> indexes [ <i>I</i> ≥ 2σ( <i>I</i> )] <sup>a</sup> | <i>R</i> <sub>1</sub> = 0.0169, <i>wR</i> <sub>2</sub> = 0.0483              | <i>R</i> <sub>1</sub> = 0.0234, <i>wR</i> <sub>2</sub> = 0.0495              |
| Final <i>R</i> indexes [all data] <sup>a</sup>                   | <i>R</i> <sub>1</sub> = 0.0179, <i>wR</i> <sub>2</sub> = 0.0492              | <i>R</i> <sub>1</sub> = 0.0253, <i>wR</i> <sub>2</sub> = 0.0501              |
| Largest diff. peak / hole (e/Å <sup>-3</sup> )                   | 0.96 / -0.64                                                                 | 1.04 / -0.85                                                                 |

<sup>a</sup>  $R_1 = \frac{\sum ||F_o| - |F_c||}{\sum |F_o|}$  and  $wR_2 = \left[ \frac{\sum w (F_o^2 - F_c^2)^2}{\sum w F_o^4} \right]^{1/2}$  for  $F_o^2 > 2\sigma(F_o^2)$

**Table S2.** Fractional atomic coordinates ( $\times 10^4$ ), equivalent isotropic displacement Parameters ( $\text{\AA}^2 \times 10^3$ ), and bond valence sum (BVS) for  $\text{Cs}_4\text{BaSb}_2\text{Se}_8$  (293 K).  $U_{\text{eq}}$  is defined as 1/3 of the trace of the orthogonalised  $U_{\text{II}}$  tensor.

| Atom | x         | y         | z         | $U_{\text{eq}}$ | Wyckoff positions | BVS <sup>[a]</sup> |
|------|-----------|-----------|-----------|-----------------|-------------------|--------------------|
| Cs1  | 5829.3(2) | 1156.4(3) | 5000      | 29.86(11)       | 8j                | 1.16               |
| Cs2  | 7443.6(2) | 5000      | 2500      | 43.46(13)       | 8f                | 0.72               |
| Ba1  | 5000      | 5000      | 2500      | 20.55(11)       | 4a                | 1.66               |
| Sb1  | 6293.4(2) | 7031.4(3) | 5000      | 16.69(10)       | 8j                | 5.39               |
| Se1  | 5760.2(2) | 7977.9(4) | 3198.3(4) | 30.45(12)       | 16k               | 2.13               |
| Se2  | 6030.7(3) | 4612.9(5) | 5000      | 25.21(13)       | 8j                | 2.17               |
| Se3  | 7478.4(3) | 7529.7(6) | 5000      | 30.50(15)       | 8j                | 2.15               |

[a] The bond valence sum is calculated by bond-valence theory ( $S_{ij} = \exp[(R_0 - R)/B]$ , where  $R$  is an empirical constant,  $R_0$  is the length of bond I (in angstroms), and  $B = 0.37$ ).

**Table S3.** Anisotropic displacement parameters ( $\text{\AA}^2 \times 10^3$ ) for  $\text{Cs}_4\text{BaSb}_2\text{Se}_8$  (293K). The anisotropic displacement factor exponent takes the form:  $-2\pi^2[h^2a^2U_{11}+2hka^*b^*U_{12}+\dots]$ .

| Atom | $U_{11}$  | $U_{22}$  | $U_{33}$  | $U_{23}$  | $U_{13}$  | $U_{12}$  |
|------|-----------|-----------|-----------|-----------|-----------|-----------|
| Cs1  | 37.00(19) | 22.27(17) | 30.32(19) | 0         | 0         | -3.85(13) |
| Cs2  | 58.8(3)   | 43.2(2)   | 28.4(2)   | -4.93(16) | 0         | 0         |
| Ba1  | 21.72(19) | 19.5(2)   | 20.4(2)   | 0         | 0         | 0         |
| Sb1  | 17.45(16) | 16.22(17) | 16.39(16) | 0         | 0         | -1.11(10) |
| Se1  | 44.5(2)   | 26.7(2)   | 20.2(2)   | 3.53(14)  | -9.43(15) | -1.60(15) |
| Se2  | 26.4(2)   | 15.6(2)   | 33.6(3)   | 0         | 0         | -0.53(18) |
| Se3  | 19.2(2)   | 37.3(3)   | 34.9(3)   | 0         | 0         | -6.2(2)   |

**Table S4.** Bond lengths for Cs<sub>4</sub>BaSb<sub>2</sub>Se<sub>8</sub> (293K).

| Atom | Atom              | Length/Å  | Atom | Atom              | Length/Å  |
|------|-------------------|-----------|------|-------------------|-----------|
| Cs1  | Se2               | 3.4791(6) | Cs2  | Se3 <sup>4</sup>  | 3.7496(4) |
| Cs1  | Se1 <sup>5</sup>  | 3.6477(4) | Cs2  | Se3 <sup>16</sup> | 3.7124(4) |
| Cs1  | Se1 <sup>3</sup>  | 3.8899(6) | Ba1  | Se2 <sup>3</sup>  | 3.4906(3) |
| Cs1  | Se1 <sup>11</sup> | 3.6477(4) | Ba1  | Se2 <sup>1</sup>  | 3.4906(3) |
| Cs1  | Se1 <sup>12</sup> | 3.7540(5) | Ba1  | Se2 <sup>4</sup>  | 3.4906(3) |
| Cs1  | Se1 <sup>13</sup> | 3.7540(5) | Ba1  | Se2               | 3.4905(3) |
| Cs1  | Se1 <sup>2</sup>  | 3.8899(6) | Ba1  | Se1 <sup>1</sup>  | 3.4405(4) |
| Cs1  | Se3 <sup>14</sup> | 3.6980(7) | Ba1  | Se1 <sup>5</sup>  | 3.4405(4) |
| Cs2  | Se2               | 4.0038(5) | Ba1  | Se1               | 3.4405(4) |
| Cs2  | Se2 <sup>4</sup>  | 4.0038(5) | Ba1  | Se1 <sup>2</sup>  | 3.4405(4) |
| Cs2  | Se1 <sup>15</sup> | 4.2388(6) | Sb1  | Se2               | 2.4755(6) |
| Cs2  | Se1 <sup>16</sup> | 4.2388(6) | Sb1  | Se1               | 2.4585(4) |
| Cs2  | Se3 <sup>14</sup> | 3.7124(4) | Sb1  | Se1 <sup>7</sup>  | 2.4585(4) |
| Cs2  | Se3               | 3.7495(4) | Sb1  | Se3               | 2.4557(6) |

<sup>1</sup>1-X,+Y,1/2-Z;<sup>2</sup>1-X,1-Y,+Z;<sup>3</sup>1-X,1-Y,1-Z;<sup>4</sup>+X,1-Y,-1/2+Z;<sup>5</sup>+X,1-Y,1/2-Z;<sup>6</sup>+X,1+Y,+Z;<sup>7</sup>+X,+Y,1-Z;<sup>8</sup>1-X,-Y,1-Z;<sup>9</sup>3/2-X,1/2-Y,1/2+Z;<sup>10</sup>3/2-X,1/2-Y,1/2-Z;<sup>11</sup>+X,1-Y,1/2+Z;<sup>12</sup>+X,-1+Y,1-Z;<sup>13</sup>+X,-1+Y,+Z;<sup>14</sup>3/2-X,-1/2+Y,1-Z;<sup>15</sup>3/2-X,-1/2+Y,+Z;<sup>16</sup>3/2-X,3/2-Y,1/2-Z

**Table S5.** Bond angles for Cs<sub>4</sub>BaSb<sub>2</sub>Se<sub>8</sub> (293K).

| Atom              | Atom | Atom              | Angle/°     | Atom              | Atom | Atom              | Angle/°     |
|-------------------|------|-------------------|-------------|-------------------|------|-------------------|-------------|
| Se1 <sup>8</sup>  | Cs1  | Se1 <sup>3</sup>  | 115.452(11) | Se3 <sup>4</sup>  | Cs2  | Se1 <sup>16</sup> | 78.278(11)  |
| Se1 <sup>12</sup> | Cs1  | Se1 <sup>2</sup>  | 114.398(11) | Se3 <sup>4</sup>  | Cs2  | Se1 <sup>17</sup> | 99.831(13)  |
| Se1 <sup>12</sup> | Cs1  | Se1 <sup>13</sup> | 71.554(10)  | Se3               | Cs2  | Se1 <sup>17</sup> | 78.279(11)  |
| Se1 <sup>5</sup>  | Cs1  | Se1 <sup>13</sup> | 135.653(11) | Se3 <sup>17</sup> | Cs2  | Se1 <sup>17</sup> | 60.677(10)  |
| Se1 <sup>8</sup>  | Cs1  | Se1 <sup>13</sup> | 64.192(14)  | Se3 <sup>17</sup> | Cs2  | Se1 <sup>16</sup> | 114.614(14) |
| Se1 <sup>12</sup> | Cs1  | Se1 <sup>8</sup>  | 135.653(11) | Se3               | Cs2  | Se1 <sup>16</sup> | 99.832(13)  |
| Se1 <sup>5</sup>  | Cs1  | Se1 <sup>2</sup>  | 54.379(12)  | Se3 <sup>14</sup> | Cs2  | Se1 <sup>16</sup> | 60.677(10)  |
| Se1 <sup>2</sup>  | Cs1  | Se1 <sup>3</sup>  | 61.698(13)  | Se3 <sup>14</sup> | Cs2  | Se1 <sup>17</sup> | 114.614(14) |
| Se1 <sup>12</sup> | Cs1  | Se1 <sup>5</sup>  | 152.186(16) | Se3 <sup>14</sup> | Cs2  | Se3               | 84.113(4)   |
| Se1 <sup>12</sup> | Cs1  | Se1 <sup>3</sup>  | 54.379(12)  | Se3 <sup>17</sup> | Cs2  | Se3               | 95.794(5)   |
| Se1 <sup>13</sup> | Cs1  | Se1 <sup>2</sup>  | 115.452(11) | Se3 <sup>17</sup> | Cs2  | Se3 <sup>4</sup>  | 84.114(5)   |
| Se1 <sup>5</sup>  | Cs1  | Se3 <sup>14</sup> | 86.999(9)   | Se3 <sup>14</sup> | Cs2  | Se3 <sup>17</sup> | 175.12(2)   |
| Se1 <sup>12</sup> | Cs1  | Se3 <sup>14</sup> | 86.999(9)   | Se3               | Cs2  | Se3 <sup>4</sup>  | 177.84(2)   |
| Se3 <sup>14</sup> | Cs1  | Se1 <sup>2</sup>  | 133.421(12) | Se3 <sup>14</sup> | Cs2  | Se3 <sup>4</sup>  | 95.794(5)   |
| Se3 <sup>14</sup> | Cs1  | Se1 <sup>13</sup> | 110.419(13) | Se2               | Ba1  | Se2 <sup>4</sup>  | 106.378(14) |
| Se3 <sup>14</sup> | Cs1  | Se1 <sup>3</sup>  | 133.421(11) | Se2 <sup>3</sup>  | Ba1  | Se2 <sup>4</sup>  | 167.273(17) |
| Se3 <sup>14</sup> | Cs1  | Se1 <sup>8</sup>  | 110.419(13) | Se2 <sup>1</sup>  | Ba1  | Se2 <sup>4</sup>  | 75.085(14)  |
| Se1 <sup>5</sup>  | Cs1  | Se1 <sup>3</sup>  | 114.398(11) | Se2 <sup>1</sup>  | Ba1  | Se2 <sup>3</sup>  | 106.377(14) |
| Se1 <sup>13</sup> | Cs1  | Se1 <sup>3</sup>  | 83.387(11)  | Se2               | Ba1  | Se2 <sup>3</sup>  | 75.084(14)  |
| Se1 <sup>5</sup>  | Cs1  | Se1 <sup>8</sup>  | 71.554(11)  | Se2               | Ba1  | Se2 <sup>1</sup>  | 167.273(17) |
| Se2               | Cs1  | Se1 <sup>12</sup> | 76.639(8)   | Se1 <sup>5</sup>  | Ba1  | Se2 <sup>3</sup>  | 122.867(10) |
| Se2               | Cs1  | Se1 <sup>5</sup>  | 76.639(8)   | Se1 <sup>2</sup>  | Ba1  | Se2 <sup>1</sup>  | 79.259(11)  |
| Se2               | Cs1  | Se1 <sup>2</sup>  | 82.902(12)  | Se1 <sup>5</sup>  | Ba1  | Se2 <sup>1</sup>  | 89.690(11)  |
| Se2               | Cs1  | Se1 <sup>3</sup>  | 82.902(12)  | Se1 <sup>2</sup>  | Ba1  | Se2 <sup>4</sup>  | 122.867(10) |
| Se2               | Cs1  | Se1 <sup>8</sup>  | 147.658(7)  | Se1 <sup>1</sup>  | Ba1  | Se2 <sup>1</sup>  | 69.457(11)  |
| Se2               | Cs1  | Se1 <sup>13</sup> | 147.658(7)  | Se1 <sup>5</sup>  | Ba1  | Se2 <sup>4</sup>  | 69.457(11)  |
| Se2               | Cs1  | Se3 <sup>14</sup> | 61.466(14)  | Se1 <sup>5</sup>  | Ba1  | Se2               | 79.259(11)  |
| Se1 <sup>8</sup>  | Cs1  | Se1 <sup>2</sup>  | 83.387(11)  | Se1 <sup>2</sup>  | Ba1  | Se2               | 89.689(11)  |
| Se2 <sup>4</sup>  | Cs2  | Se2               | 88.532(15)  | Se1 <sup>1</sup>  | Ba1  | Se2 <sup>3</sup>  | 79.259(11)  |
| Se2 <sup>4</sup>  | Cs2  | Se1 <sup>16</sup> | 141.989(9)  | Se1               | Ba1  | Se2 <sup>3</sup>  | 89.690(11)  |
| Se2 <sup>4</sup>  | Cs2  | Se1 <sup>17</sup> | 116.334(9)  | Se1               | Ba1  | Se2 <sup>1</sup>  | 122.868(10) |
| Se2               | Cs2  | Se1 <sup>16</sup> | 116.334(9)  | Se1               | Ba1  | Se2 <sup>4</sup>  | 79.259(11)  |
| Se2               | Cs2  | Se1 <sup>17</sup> | 141.990(9)  | Se1 <sup>1</sup>  | Ba1  | Se2 <sup>4</sup>  | 89.690(11)  |
| Se1 <sup>17</sup> | Cs2  | Se1 <sup>16</sup> | 61.398(13)  | Se1 <sup>2</sup>  | Ba1  | Se2 <sup>3</sup>  | 69.457(11)  |
| Se3 <sup>14</sup> | Cs2  | Se2 <sup>4</sup>  | 127.599(15) | Se1               | Ba1  | Se2               | 69.457(11)  |
| Se3 <sup>17</sup> | Cs2  | Se2               | 127.599(15) | Se1 <sup>1</sup>  | Ba1  | Se2               | 122.867(10) |
| Se3 <sup>4</sup>  | Cs2  | Se2 <sup>4</sup>  | 64.431(10)  | Se1 <sup>2</sup>  | Ba1  | Se1 <sup>5</sup>  | 60.199(14)  |
| Se3 <sup>14</sup> | Cs2  | Se2               | 56.693(11)  | Se1 <sup>5</sup>  | Ba1  | Se1 <sup>1</sup>  | 154.030(13) |
| Se3               | Cs2  | Se2 <sup>4</sup>  | 117.296(13) | Se1 <sup>2</sup>  | Ba1  | Se1 <sup>1</sup>  | 126.724(15) |
| Se3               | Cs2  | Se2               | 64.431(10)  | Se1 <sup>5</sup>  | Ba1  | Se1               | 126.724(15) |
| Se3 <sup>17</sup> | Cs2  | Se2 <sup>4</sup>  | 56.692(11)  | Se1 <sup>2</sup>  | Ba1  | Se1               | 154.030(14) |
| Se3 <sup>4</sup>  | Cs2  | Se2               | 117.296(13) | Se1 <sup>1</sup>  | Ba1  | Se1               | 60.199(14)  |

|                  |     |                  |             |     |     |                  |             |
|------------------|-----|------------------|-------------|-----|-----|------------------|-------------|
| Se1              | Sb1 | Se2              | 106.322(14) | Se3 | Sb1 | Se2              | 114.14(2)   |
| Se1 <sup>7</sup> | Sb1 | Se2              | 106.321(14) | Se3 | Sb1 | Se1              | 110.663(15) |
| Se1              | Sb1 | Se1 <sup>7</sup> | 108.45(2)   | Se3 | Sb1 | Se1 <sup>7</sup> | 110.663(15) |

<sup>1</sup>1-X,+Y,1/2-Z;<sup>2</sup>1-X,1-Y,+Z;<sup>3</sup>1-X,1-Y,1-Z;<sup>4</sup>+X,1-Y,-1/2+Z;<sup>5</sup>+X,1-Y,1/2-Z;<sup>6</sup>+X,1+Y,+Z;<sup>7</sup>+X,+Y,1-Z;<sup>8</sup>+X,-1+Y,+Z;<sup>9</sup>3/2-X,1/2-Y,1/2+Z;<sup>10</sup>3/2-X,1/2-Y,1/2-Z;<sup>11</sup>1-X,-Y,1-Z;<sup>12</sup>+X,1-Y,1/2+Z;<sup>13</sup>+X,-1+Y,1-Z;<sup>14</sup>3/2-X,-1/2+Y,1-Z;<sup>15</sup>3/2-X,1/2+Y,1-Z;<sup>16</sup>3/2-X,-1/2+Y,+Z;<sup>17</sup>3/2-X,3/2-Y,1/2-Z;<sup>18</sup>3/2-X,3/2-Y,1/2+Z

**Table S6.** Fractional atomic coordinates ( $\times 10^4$ ), equivalent isotropic displacement Parameters ( $\text{\AA}^2 \times 10^3$ ), and bond valence sum (BVS) for  $\text{Rb}_4\text{BaSb}_2\text{Se}_8$  (293 K).  $U_{\text{eq}}$  is defined as 1/3 of the trace of the orthogonalised  $U_{\text{II}}$  tensor.

| Atom | x         | y         | z         | U(eq)     | Wyckoff positions | BVS <sup>[a]</sup> |
|------|-----------|-----------|-----------|-----------|-------------------|--------------------|
| Rb1  | 4201.3(4) | 1170.0(7) | 5000      | 32.93(18) | 8j                | 1.03               |
| Rb2  | 2477.5(5) | 10000     | 7500      | 50.5(2)   | 8f                | 0.58               |
| Ba1  | 5000      | 5000      | 7500      | 20.53(13) | 4a                | 1.73               |
| Sb1  | 3686.8(2) | 7057.2(4) | 5000      | 16.18(11) | 8j                | 5.38               |
| Se1  | 4226.4(3) | 8085.2(5) | 6817.7(5) | 32.66(15) | 16k               | 1.95               |
| Se2  | 3967.1(3) | 4578.4(7) | 5000      | 25.14(16) | 8j                | 2.06               |
| Se3  | 2489.2(4) | 7505.5(8) | 5000      | 33.07(18) | 8j                | 1.89               |

[a] The bond valence sum is calculated by bond-valence theory ( $S_{ij} = \exp[(R_{ij}-R)/B]$ , where  $R$  is an empirical constant,  $R_{ij}$  is the length of bond I (in angstroms), and  $B = 0.37$ ).



**Table S7.** Anisotropic displacement parameters ( $\text{\AA}^2 \times 10^3$ ) for  $\text{Rb}_4\text{BaSb}_2\text{Se}_8$  (293K). The anisotropic displacement factor exponent takes the form:  $-2\pi^2[h^2a^2U_{11}+2hka^*b^*U_{12}+\dots]$ .

| Atom | $U_{11}$ | $U_{22}$ | $U_{33}$ | $U_{23}$  | $U_{13}$ | $U_{12}$ |
|------|----------|----------|----------|-----------|----------|----------|
| Rb1  | 45.9(4)  | 22.0(3)  | 30.9(4)  | 0         | 0        | 3.9(3)   |
| Rb2  | 69.6(6)  | 47.6(5)  | 34.2(4)  | 7.6(4)    | 0        | 0        |
| Ba1  | 21.7(3)  | 20.1(3)  | 19.8(3)  | 0         | 0        | 0        |
| Sb1  | 16.8(2)  | 15.4(2)  | 16.3(2)  | 0         | 0        | 1.16(14) |
| Se1  | 51.8(3)  | 26.3(3)  | 19.8(3)  | -3.98(19) | -11.1(2) | 0.8(2)   |
| Se2  | 25.1(3)  | 14.6(3)  | 35.8(4)  | 0         | 0        | -0.5(2)  |
| Se3  | 19.1(3)  | 38.9(4)  | 41.2(4)  | 0         | 0        | 6.4(3)   |

**Table S8.** Bond lengths for Rb<sub>4</sub>BaSb<sub>2</sub>Se<sub>8</sub> (293K)

| Atom | Atom              | Length/Å   | Atom | Atom              | Length/Å   |
|------|-------------------|------------|------|-------------------|------------|
| Rb1  | Se3 <sup>9</sup>  | 3.6509(11) | Rb2  | Se1               | 4.0578(11) |
| Rb1  | Se2               | 3.3440(10) | Rb2  | Se1 <sup>6</sup>  | 4.0578(11) |
| Rb1  | Se1 <sup>8</sup>  | 3.5806(8)  | Ba1  | Se2 <sup>15</sup> | 3.4323(4)  |
| Rb1  | Se1 <sup>10</sup> | 3.5069(5)  | Ba1  | Se2 <sup>2</sup>  | 3.4323(4)  |
| Rb1  | Se1 <sup>11</sup> | 3.5069(5)  | Ba1  | Se2 <sup>13</sup> | 3.4323(4)  |
| Rb1  | Se1 <sup>12</sup> | 3.5806(8)  | Ba1  | Se2               | 3.4324(4)  |
| Rb1  | Se1 <sup>13</sup> | 3.7999(9)  | Ba1  | Se1 <sup>15</sup> | 3.4581(5)  |
| Rb1  | Se1 <sup>14</sup> | 3.7999(9)  | Ba1  | Se1 <sup>10</sup> | 3.4581(5)  |
| Rb2  | Se3 <sup>5</sup>  | 3.6244(6)  | Ba1  | Se1 <sup>14</sup> | 3.4581(5)  |
| Rb2  | Se3               | 3.6243(6)  | Ba1  | Se1               | 3.4582(5)  |
| Rb2  | Se3 <sup>4</sup>  | 3.6321(6)  | Sb1  | Se3               | 2.4565(8)  |
| Rb2  | Se3 <sup>3</sup>  | 3.6321(6)  | Sb1  | Se2               | 2.4732(7)  |
| Rb2  | Se2 <sup>4</sup>  | 3.9923(9)  | Sb1  | Se1 <sup>16</sup> | 2.4545(5)  |
| Rb2  | Se2 <sup>3</sup>  | 3.9923(9)  | Sb1  | Se1               | 2.4545(5)  |

<sup>1</sup>+X,1+Y,+Z;<sup>2</sup>+X,1-Y,1/2+Z;<sup>3</sup>1/2-X,3/2-Y,3/2-Z;<sup>4</sup>1/2-X,1/2+Y,1-Z;<sup>5</sup>+X,2-Y,1/2+Z;<sup>6</sup>+X,2-Y,3/2-Z;<sup>7</sup>1-X,-Y,1-Z;<sup>8</sup>+X,-1+Y,+Z;<sup>9</sup>1/2-X,-1/2+Y,1-Z;<sup>10</sup>+X,1-Y,3/2-Z;<sup>11</sup>+X,1-Y,-1/2+Z;<sup>12</sup>+X,-1+Y,1-Z;<sup>13</sup>1-X,1-Y,1-Z;<sup>14</sup>1-X,1-Y,+Z;<sup>15</sup>1-X,+Y,3/2-Z;<sup>16</sup>+X,+Y,1-Z

**Table S9.** Bond angles for Rb<sub>4</sub>BaSb<sub>2</sub>Se<sub>8</sub> (293K).

| Atom              | Atom | Atom              | Angle/°     | Atom              | Atom | Atom              | Angle/°     |
|-------------------|------|-------------------|-------------|-------------------|------|-------------------|-------------|
| Se3 <sup>10</sup> | Rb1  | Se1 <sup>11</sup> | 135.494(19) | Se3 <sup>4</sup>  | Rb2  | Se1 <sup>6</sup>  | 99.00(2)    |
| Se3 <sup>10</sup> | Rb1  | Se1 <sup>12</sup> | 135.494(19) | Se3 <sup>3</sup>  | Rb2  | Se1 <sup>6</sup>  | 79.126(18)  |
| Se2               | Rb1  | Se3 <sup>10</sup> | 61.06(2)    | Se3 <sup>5</sup>  | Rb2  | Se1               | 115.82(3)   |
| Se2               | Rb1  | Se1 <sup>11</sup> | 85.96(2)    | Se3 <sup>5</sup>  | Rb2  | Se1 <sup>6</sup>  | 63.456(16)  |
| Se2               | Rb1  | Se1 <sup>12</sup> | 85.96(2)    | Se3 <sup>4</sup>  | Rb2  | Se1               | 79.126(18)  |
| Se2               | Rb1  | Se1 <sup>8</sup>  | 146.137(11) | Se3               | Rb2  | Se1               | 63.456(16)  |
| Se2               | Rb1  | Se1 <sup>13</sup> | 78.337(14)  | Se2 <sup>3</sup>  | Rb2  | Se2 <sup>4</sup>  | 86.14(2)    |
| Se2               | Rb1  | Se1 <sup>14</sup> | 78.337(14)  | Se2 <sup>4</sup>  | Rb2  | Se1               | 143.612(12) |
| Se2               | Rb1  | Se1 <sup>7</sup>  | 146.137(11) | Se2 <sup>4</sup>  | Rb2  | Se1 <sup>6</sup>  | 117.788(11) |
| Se1 <sup>13</sup> | Rb1  | Se3 <sup>10</sup> | 86.573(16)  | Se2 <sup>3</sup>  | Rb2  | Se1 <sup>6</sup>  | 143.612(12) |
| Se1 <sup>14</sup> | Rb1  | Se3 <sup>10</sup> | 86.573(16)  | Se2 <sup>3</sup>  | Rb2  | Se1               | 117.788(11) |
| Se1 <sup>7</sup>  | Rb1  | Se3 <sup>10</sup> | 108.09(2)   | Se1 <sup>6</sup>  | Rb2  | Se1               | 59.06(2)    |
| Se1 <sup>8</sup>  | Rb1  | Se3 <sup>10</sup> | 108.09(2)   | Se3 <sup>3</sup>  | Rb2  | Se1               | 99.00(2)    |
| Se1 <sup>13</sup> | Rb1  | Se1 <sup>7</sup>  | 68.708(14)  | Se3               | Rb2  | Se1 <sup>6</sup>  | 115.82(3)   |
| Se1 <sup>13</sup> | Rb1  | Se1 <sup>12</sup> | 56.224(17)  | Se2 <sup>1</sup>  | Ba1  | Se2 <sup>12</sup> | 166.30(2)   |
| Se1 <sup>11</sup> | Rb1  | Se1 <sup>12</sup> | 62.10(2)    | Se2 <sup>15</sup> | Ba1  | Se2               | 166.30(2)   |
| Se1 <sup>7</sup>  | Rb1  | Se1 <sup>11</sup> | 115.45(2)   | Se2 <sup>12</sup> | Ba1  | Se2               | 76.499(18)  |
| Se1 <sup>8</sup>  | Rb1  | Se1 <sup>12</sup> | 115.45(2)   | Se2 <sup>15</sup> | Ba1  | Se2 <sup>12</sup> | 105.185(19) |
| Se1 <sup>7</sup>  | Rb1  | Se1 <sup>8</sup>  | 66.37(2)    | Se2 <sup>1</sup>  | Ba1  | Se2               | 105.184(19) |
| Se1 <sup>13</sup> | Rb1  | Se1 <sup>8</sup>  | 135.067(19) | Se2 <sup>15</sup> | Ba1  | Se2 <sup>1</sup>  | 76.499(18)  |
| Se1 <sup>8</sup>  | Rb1  | Se1 <sup>11</sup> | 82.251(17)  | Se2               | Ba1  | Se1 <sup>15</sup> | 123.009(13) |
| Se1 <sup>14</sup> | Rb1  | Se1 <sup>12</sup> | 116.95(2)   | Se2 <sup>1</sup>  | Ba1  | Se1 <sup>11</sup> | 123.009(13) |
| Se1 <sup>7</sup>  | Rb1  | Se1 <sup>12</sup> | 82.251(17)  | Se2 <sup>12</sup> | Ba1  | Se1 <sup>14</sup> | 123.009(13) |
| Se1 <sup>14</sup> | Rb1  | Se1 <sup>7</sup>  | 135.067(19) | Se2 <sup>15</sup> | Ba1  | Se1 <sup>14</sup> | 90.225(14)  |
| Se1 <sup>14</sup> | Rb1  | Se1 <sup>8</sup>  | 68.708(14)  | Se2               | Ba1  | Se1               | 70.243(13)  |
| Se1 <sup>14</sup> | Rb1  | Se1 <sup>11</sup> | 56.224(17)  | Se2 <sup>1</sup>  | Ba1  | Se1 <sup>14</sup> | 70.243(14)  |
| Se1 <sup>13</sup> | Rb1  | Se1 <sup>11</sup> | 116.95(2)   | Se2 <sup>12</sup> | Ba1  | Se1 <sup>11</sup> | 70.243(14)  |
| Se1 <sup>14</sup> | Rb1  | Se1 <sup>13</sup> | 156.13(3)   | Se2 <sup>15</sup> | Ba1  | Se1 <sup>15</sup> | 70.243(14)  |
| Se3               | Rb2  | Se3 <sup>5</sup>  | 179.25(4)   | Se2 <sup>15</sup> | Ba1  | Se1               | 123.009(13) |
| Se3 <sup>5</sup>  | Rb2  | Se3 <sup>3</sup>  | 95.967(4)   | Se2 <sup>15</sup> | Ba1  | Se1 <sup>11</sup> | 77.839(14)  |
| Se3               | Rb2  | Se3 <sup>3</sup>  | 84.019(4)   | Se2 <sup>12</sup> | Ba1  | Se1               | 90.224(14)  |
| Se3 <sup>5</sup>  | Rb2  | Se3 <sup>4</sup>  | 84.019(4)   | Se2 <sup>1</sup>  | Ba1  | Se1               | 77.840(14)  |
| Se3               | Rb2  | Se3 <sup>4</sup>  | 95.967(4)   | Se2               | Ba1  | Se1 <sup>14</sup> | 77.839(14)  |
| Se3 <sup>3</sup>  | Rb2  | Se3 <sup>4</sup>  | 177.88(4)   | Se2 <sup>1</sup>  | Ba1  | Se1 <sup>15</sup> | 90.225(14)  |
| Se3 <sup>3</sup>  | Rb2  | Se2 <sup>4</sup>  | 116.48(2)   | Se2 <sup>12</sup> | Ba1  | Se1 <sup>15</sup> | 77.839(14)  |
| Se3 <sup>3</sup>  | Rb2  | Se2 <sup>3</sup>  | 65.240(15)  | Se2               | Ba1  | Se1 <sup>11</sup> | 90.225(14)  |
| Se3 <sup>5</sup>  | Rb2  | Se2 <sup>3</sup>  | 125.13(3)   | Se1 <sup>15</sup> | Ba1  | Se1 <sup>11</sup> | 126.31(2)   |
| Se3               | Rb2  | Se2 <sup>4</sup>  | 125.13(3)   | Se1 <sup>11</sup> | Ba1  | Se1               | 155.436(17) |
| Se3               | Rb2  | Se2 <sup>3</sup>  | 55.534(15)  | Se1 <sup>15</sup> | Ba1  | Se1               | 59.894(18)  |
| Se3 <sup>4</sup>  | Rb2  | Se2 <sup>3</sup>  | 116.48(2)   | Se1 <sup>15</sup> | Ba1  | Se1 <sup>14</sup> | 155.436(17) |
| Se3 <sup>4</sup>  | Rb2  | Se2 <sup>4</sup>  | 65.240(15)  | Se1 <sup>14</sup> | Ba1  | Se1               | 126.31(2)   |
| Se3 <sup>5</sup>  | Rb2  | Se2 <sup>4</sup>  | 55.533(16)  | Se1 <sup>14</sup> | Ba1  | Se1 <sup>11</sup> | 59.895(18)  |

|     |     |     |           |                   |     |     |             |
|-----|-----|-----|-----------|-------------------|-----|-----|-------------|
| Se3 | Sb1 | Se2 | 113.44(3) | Se1 <sup>17</sup> | Sb1 | Se3 | 111.39(2)   |
| Se1 | Sb1 | Se3 | 111.39(2) | Se1 <sup>17</sup> | Sb1 | Se2 | 107.121(18) |

<sup>1</sup>+X,1-Y,1/2+Z;<sup>2</sup>+X,1+Y,+Z;<sup>3</sup>1/2-X,1/2+Y,1-Z;<sup>4</sup>1/2-X,3/2-Y,3/2-Z;<sup>5</sup>+X,2-Y,1/2+Z;<sup>6</sup>+X,2-Y,3/2-Z;<sup>7</sup>+X,-1+Y,1-Z;<sup>8</sup>+X,-1+Y,+Z;<sup>9</sup>1-X,-Y,1-Z;<sup>10</sup>1/2-X,-1/2+Y,1-Z;<sup>11</sup>1-X,1-Y,+Z;<sup>12</sup>1-X,1-Y,1-Z;<sup>13</sup>+X,1-Y,-1/2+Z;<sup>14</sup>+X,1-Y,3/2-Z;<sup>15</sup>1-X,+Y,3/2-Z;<sup>16</sup>1/2-X,3/2-Y,-1/2+Z;<sup>17</sup>+X,+Y,1-Z

**Table S10.** Crystal data and structure refinement for Rb<sub>2</sub>BaSb<sub>4</sub>SCl (293 K).

| Empirical formula                                                | Rb <sub>2</sub> BaSb <sub>4</sub> Cl                                         |
|------------------------------------------------------------------|------------------------------------------------------------------------------|
| Formula weight (Da)                                              | 593.72                                                                       |
| Temperature (K)                                                  | 273.15                                                                       |
| Crystal system                                                   | Monoclinic                                                                   |
| Space group                                                      | <i>P</i> 2 <sub>1</sub> / <i>c</i>                                           |
| <i>a</i> (Å)                                                     | 10.1114(15)                                                                  |
| <i>b</i> (Å)                                                     | 9.0493(13)                                                                   |
| <i>c</i> (Å)                                                     | 12.3826(16)                                                                  |
| $\alpha$ (°)                                                     | 90                                                                           |
| $\beta$ (°)                                                      | 90.382(6)                                                                    |
| $\gamma$ (°)                                                     | 90                                                                           |
| Volume (Å <sup>3</sup> )                                         | 1133.0(3)                                                                    |
| <i>Z</i>                                                         | 4                                                                            |
| Density (calc.) (g/cm <sup>3</sup> )                             | 3.481                                                                        |
| Absorption coefficient /mm <sup>-1</sup>                         | 15.278                                                                       |
| <i>F</i> (000)                                                   | 1048.0                                                                       |
| Completeness to $\theta$ (%)                                     | 99.7                                                                         |
| Theta range for data collection                                  | 4.028 to 50.054                                                              |
| Index ranges                                                     | -12 ≤ <i>h</i> ≤ 12, -10 ≤ <i>k</i> ≤ 10, -14 ≤ <i>l</i> ≤ 14                |
| Reflections collected                                            | 49877                                                                        |
| Independent reflections                                          | 1995 [ <i>R</i> <sub>int</sub> = 0.1184, <i>R</i> <sub>sigma</sub> = 0.0356] |
| Data / restraints / parameters                                   | 1995 / 0 / 83                                                                |
| Goodness-of-fit on <i>F</i> <sup>2</sup>                         | 1.052                                                                        |
| Final <i>R</i> indexes [ <i>I</i> ≥ 2σ( <i>I</i> )] <sup>a</sup> | <i>R</i> <sub>1</sub> = 0.0339, <i>wR</i> <sub>2</sub> = 0.0777              |
| Final <i>R</i> indexes [all data] <sup>a</sup>                   | <i>R</i> <sub>1</sub> = 0.0420, <i>wR</i> <sub>2</sub> = 0.0822              |
| Largest diff. peak / hole / e Å <sup>-3</sup>                    | 1.60/-1.01                                                                   |

<sup>a</sup>  $R_1 = \sum ||F_o| - |F_c|| / \sum |F_o|$  and  $wR_2 = [\sum w (F_o^2 - F_c^2)^2 / \sum w F_o^4]^{1/2}$  for  $F_o^2 > 2\sigma(F_o^2)$

**Table S11.** Fractional atomic coordinates ( $\times 10^4$ ) and equivalent isotropic displacement parameters ( $\text{\AA}^2 \times 10^3$ ) for  $\text{Rb}_2\text{BaSb}_4\text{SCl}$  (293K).  $U_{\text{eq}}$  is defined as 1/3 of the trace of the orthogonalised  $U_{\text{IJ}}$  tensor.

| Atom | x          | y         | z          | U(eq)     | Wyckoff positions | BVS <sup>[a]</sup> |
|------|------------|-----------|------------|-----------|-------------------|--------------------|
| Rb1  | 7430.5(8)  | 1150.2(9) | 5263.6(7)  | 22.6(2)   | 4e                | 1.42               |
| Rb2  | 4761.0(12) | 802.8(15) | 8259.1(9)  | 50.5(3)   | 4e                | 0.64               |
| Ba1  | 153.1(6)   | 939.6(7)  | 8181.3(5)  | 29.2(2)   | 4e                | 1.66               |
| Sb1  | 2412.7(5)  | 3038.0(6) | 5961.3(4)  | 16.74(19) | 4e                | 5.80               |
| S1   | 2241(3)    | 5239(3)   | 5012.5(19) | 30.7(6)   | 4e                | 2.26               |
| S2   | 588(2)     | 1636(3)   | 5504.7(19) | 28.2(5)   | 4e                | 2.15               |
| S3   | 4377(2)    | 1879(3)   | 5607(2)    | 38.8(6)   | 4e                | 2.18               |
| S4   | 2248(3)    | 3581(3)   | 7797.3(18) | 30.7(6)   | 4e                | 2.11               |
| Cl1  | -2086(3)   | 3285(3)   | 7664(2)    | 46.5(7)   | 4e                | 0.93               |

[a] The bond valence sum is calculated by bond-valence theory ( $S_{ij} = \exp[(R_{ij}-R)/B]$ , where  $R$  is an empirical constant,  $R_{ij}$  is the length of bond I (in angstroms), and  $B = 0.37$ ).

**Table S12.** Anisotropic displacement parameters ( $\text{\AA}^2 \times 10^3$ ) for  $\text{Rb}_2\text{BaSb}_4\text{SbCl}$  (293K). The anisotropic displacement factor exponent takes the form:  $-2\pi^2[h^2a^*2U_{11}+2hka^*b^*U_{12}+\dots]$ .

| Atom | $U_{11}$ | $U_{22}$ | $U_{33}$ | $U_{23}$ | $U_{13}$ | $U_{12}$ |
|------|----------|----------|----------|----------|----------|----------|
| Rb1  | 15.0(4)  | 19.2(4)  | 33.6(5)  | 4.2(4)   | 3.3(3)   | 3.1(3)   |
| Rb2  | 49.3(7)  | 70.6(8)  | 31.6(6)  | 7.9(5)   | 1.8(5)   | 27.5(6)  |
| Ba1  | 26.5(3)  | 33.0(3)  | 28.1(3)  | 2.9(2)   | 1.9(2)   | -3.9(2)  |
| Sb1  | 16.2(3)  | 16.7(3)  | 17.3(3)  | 0.0(2)   | -0.3(2)  | -0.6(2)  |
| S1   | 46.8(15) | 17.8(11) | 27.3(12) | 3.7(9)   | -1.4(10) | -1.5(10) |
| S2   | 15.6(11) | 35.7(13) | 33.2(13) | -4.3(10) | -0.8(9)  | -6.4(10) |
| S3   | 17.0(12) | 57.5(17) | 42.0(15) | 9.8(13)  | 4.9(10)  | 11.0(12) |
| S4   | 45.6(15) | 28.0(12) | 18.4(11) | -2.9(10) | -2.3(10) | -4.9(11) |
| Cl1  | 59.3(18) | 44.6(16) | 35.6(14) | 7.2(12)  | 0.8(12)  | 9.9(13)  |

**Table S13.** Bond lengths for Rb<sub>2</sub>BaSb<sub>4</sub>SCl (293K).

| Atom | Atom             | Length/Å | Atom | Atom             | Length/Å |
|------|------------------|----------|------|------------------|----------|
| Rb1  | S1 <sup>5</sup>  | 3.303(2) | Rb2  | S4 <sup>6</sup>  | 3.867(3) |
| Rb1  | S2 <sup>3</sup>  | 3.235(2) | Rb2  | Cl1 <sup>9</sup> | 3.712(3) |
| Rb1  | S2 <sup>4</sup>  | 3.362(3) | Ba1  | S1 <sup>8</sup>  | 3.267(3) |
| Rb1  | S3 <sup>4</sup>  | 3.462(3) | Ba1  | S1 <sup>9</sup>  | 3.367(3) |
| Rb1  | S3               | 3.188(2) | Ba1  | S2 <sup>8</sup>  | 3.642(3) |
| Rb1  | S4 <sup>6</sup>  | 3.357(2) | Ba1  | S2               | 3.405(3) |
| Rb1  | Cl1 <sup>2</sup> | 3.299(3) | Ba1  | S4               | 3.231(3) |
| Rb1  | Cl1 <sup>3</sup> | 3.576(3) | Ba1  | S4 <sup>9</sup>  | 3.447(3) |
| Rb2  | S1 <sup>8</sup>  | 3.488(3) | Ba1  | Cl1 <sup>9</sup> | 3.273(3) |
| Rb2  | S1 <sup>6</sup>  | 3.734(3) | Ba1  | Cl1              | 3.165(3) |
| Rb2  | S3               | 3.445(3) | Sb1  | S1               | 2.318(2) |
| Rb2  | S3 <sup>8</sup>  | 3.608(3) | Sb1  | S2               | 2.306(2) |
| Rb2  | S3 <sup>6</sup>  | 3.915(3) | Sb1  | S3               | 2.291(2) |
| Rb2  | S4               | 3.617(3) | Sb1  | S4               | 2.333(2) |

<sup>1</sup>+X,1/2-Y,-1/2+Z; <sup>2</sup>1+X,1/2-Y,-1/2+Z; <sup>3</sup>1+X,+Y,+Z; <sup>4</sup>1-X,-Y,1-Z; <sup>5</sup>1-X,1-Y,1-Z; <sup>6</sup>1-X,-1/2+Y,3/2-Z;  
<sup>7</sup>1-X,-Y,2-Z; <sup>8</sup>+X,1/2-Y,1/2+Z; <sup>9</sup>-X,-1/2+Y,3/2-Z



**Table S14.** Bond angles for Rb<sub>2</sub>BaSb<sub>4</sub>SCl (293K).

| Atom             | Atom | Atom             | Angle/°   | Atom             | Atom | Atom             | Angle/°   |
|------------------|------|------------------|-----------|------------------|------|------------------|-----------|
| S1 <sup>5</sup>  | Rb1  | S2 <sup>4</sup>  | 130.72(7) | S3               | Rb2  | S3 <sup>6</sup>  | 128.44(7) |
| S1 <sup>5</sup>  | Rb1  | S3 <sup>4</sup>  | 143.53(7) | S3 <sup>8</sup>  | Rb2  | S4               | 69.15(6)  |
| S1 <sup>5</sup>  | Rb1  | S4 <sup>6</sup>  | 138.61(7) | S3               | Rb2  | S4 <sup>6</sup>  | 84.72(6)  |
| S1 <sup>5</sup>  | Rb1  | Cl1 <sup>3</sup> | 62.51(6)  | S3 <sup>8</sup>  | Rb2  | S4 <sup>6</sup>  | 131.57(6) |
| S2 <sup>3</sup>  | Rb1  | S1 <sup>5</sup>  | 77.01(7)  | S3               | Rb2  | S4               | 65.06(6)  |
| S2 <sup>3</sup>  | Rb1  | S2 <sup>4</sup>  | 62.51(7)  | S3 <sup>8</sup>  | Rb2  | Cl1 <sup>9</sup> | 121.54(7) |
| S2 <sup>4</sup>  | Rb1  | S3 <sup>4</sup>  | 68.44(6)  | S3               | Rb2  | Cl1 <sup>9</sup> | 78.61(7)  |
| S2 <sup>3</sup>  | Rb1  | S3 <sup>4</sup>  | 130.92(6) | S4               | Rb2  | S1 <sup>6</sup>  | 138.79(6) |
| S2 <sup>3</sup>  | Rb1  | S4 <sup>6</sup>  | 86.41(7)  | S4               | Rb2  | S3 <sup>6</sup>  | 147.31(7) |
| S2 <sup>3</sup>  | Rb1  | Cl1 <sup>3</sup> | 73.76(7)  | S4 <sup>6</sup>  | Rb2  | S3 <sup>6</sup>  | 58.46(5)  |
| S2 <sup>3</sup>  | Rb1  | Cl1 <sup>2</sup> | 85.19(7)  | S4               | Rb2  | S4 <sup>6</sup>  | 149.10(4) |
| S2 <sup>4</sup>  | Rb1  | Cl1 <sup>3</sup> | 124.18(7) | S4               | Rb2  | Cl1 <sup>9</sup> | 82.43(7)  |
| S3               | Rb1  | S1 <sup>5</sup>  | 84.68(7)  | Cl1 <sup>9</sup> | Rb2  | S1 <sup>6</sup>  | 132.83(7) |
| S3               | Rb1  | S2 <sup>3</sup>  | 156.30(8) | Cl1 <sup>9</sup> | Rb2  | S3 <sup>6</sup>  | 73.36(7)  |
| S3               | Rb1  | S2 <sup>4</sup>  | 140.56(7) | Cl1 <sup>9</sup> | Rb2  | S4 <sup>6</sup>  | 98.43(7)  |
| S3               | Rb1  | S3 <sup>4</sup>  | 72.28(8)  | S1 <sup>8</sup>  | Ba1  | S1 <sup>9</sup>  | 86.66(7)  |
| S3               | Rb1  | S4 <sup>6</sup>  | 97.87(7)  | S1 <sup>9</sup>  | Ba1  | S2               | 141.21(6) |
| S3               | Rb1  | Cl1 <sup>3</sup> | 84.53(8)  | S1 <sup>9</sup>  | Ba1  | S2 <sup>8</sup>  | 70.87(6)  |
| S3               | Rb1  | Cl1 <sup>2</sup> | 104.37(8) | S1 <sup>8</sup>  | Ba1  | S2               | 130.46(6) |
| S3 <sup>4</sup>  | Rb1  | Cl1 <sup>3</sup> | 139.06(7) | S1 <sup>8</sup>  | Ba1  | S2 <sup>8</sup>  | 64.80(5)  |
| S4 <sup>6</sup>  | Rb1  | S2 <sup>4</sup>  | 68.15(6)  | S1 <sup>8</sup>  | Ba1  | S4 <sup>9</sup>  | 119.50(6) |
| S4 <sup>6</sup>  | Rb1  | S3 <sup>4</sup>  | 73.90(6)  | S1 <sup>9</sup>  | Ba1  | S4 <sup>9</sup>  | 66.98(6)  |
| S4 <sup>6</sup>  | Rb1  | Cl1 <sup>3</sup> | 76.55(6)  | S1 <sup>8</sup>  | Ba1  | Cl1 <sup>9</sup> | 66.30(7)  |
| Cl1 <sup>2</sup> | Rb1  | S1 <sup>5</sup>  | 74.33(7)  | S2               | Ba1  | S2 <sup>8</sup>  | 129.92(3) |
| Cl1 <sup>2</sup> | Rb1  | S2 <sup>4</sup>  | 75.38(7)  | S2               | Ba1  | S4 <sup>9</sup>  | 82.40(6)  |
| Cl1 <sup>2</sup> | Rb1  | S3 <sup>4</sup>  | 84.28(7)  | S4               | Ba1  | S1 <sup>9</sup>  | 135.41(6) |
| Cl1 <sup>2</sup> | Rb1  | S4 <sup>6</sup>  | 142.29(7) | S4               | Ba1  | S1 <sup>8</sup>  | 85.54(6)  |
| Cl1 <sup>2</sup> | Rb1  | Cl1 <sup>3</sup> | 134.99(5) | S4 <sup>9</sup>  | Ba1  | S2 <sup>8</sup>  | 137.03(6) |
| Sb1 <sup>6</sup> | Rb2  | S3 <sup>6</sup>  | 34.03(4)  | S4               | Ba1  | S2 <sup>8</sup>  | 66.10(6)  |
| S1 <sup>8</sup>  | Rb2  | S1 <sup>6</sup>  | 101.52(6) | S4               | Ba1  | S2               | 68.33(6)  |
| S1 <sup>8</sup>  | Rb2  | S3 <sup>8</sup>  | 64.70(6)  | S4               | Ba1  | S4 <sup>9</sup>  | 150.16(3) |
| S1 <sup>8</sup>  | Rb2  | S3 <sup>6</sup>  | 72.15(6)  | S4               | Ba1  | Cl1 <sup>9</sup> | 95.88(7)  |
| S1 <sup>6</sup>  | Rb2  | S3 <sup>6</sup>  | 59.50(5)  | Cl1              | Ba1  | S1 <sup>8</sup>  | 144.81(7) |
| S1 <sup>8</sup>  | Rb2  | S4               | 76.76(6)  | Cl1 <sup>9</sup> | Ba1  | S1 <sup>9</sup>  | 120.51(7) |
| S1 <sup>6</sup>  | Rb2  | S4 <sup>6</sup>  | 59.28(5)  | Cl1              | Ba1  | S1 <sup>9</sup>  | 75.18(7)  |
| S1 <sup>8</sup>  | Rb2  | S4 <sup>6</sup>  | 130.25(6) | Cl1 <sup>9</sup> | Ba1  | S2 <sup>8</sup>  | 128.73(6) |
| S1 <sup>8</sup>  | Rb2  | Cl1 <sup>9</sup> | 59.47(6)  | Cl1              | Ba1  | S2 <sup>8</sup>  | 80.69(6)  |
| S3               | Rb2  | S1 <sup>8</sup>  | 126.27(7) | Cl1 <sup>9</sup> | Ba1  | S2               | 75.12(7)  |
| S3 <sup>8</sup>  | Rb2  | S1 <sup>6</sup>  | 73.08(6)  | Cl1              | Ba1  | S2               | 77.05(6)  |
| S3               | Rb2  | S1 <sup>6</sup>  | 132.14(7) | Cl1              | Ba1  | S4               | 86.73(8)  |
| S3               | Rb2  | S3 <sup>8</sup>  | 126.28(4) | Cl1 <sup>9</sup> | Ba1  | S4 <sup>9</sup>  | 81.58(7)  |
| S3 <sup>8</sup>  | Rb2  | S3 <sup>6</sup>  | 105.27(6) | Cl1              | Ba1  | S4 <sup>9</sup>  | 80.97(7)  |

|     |     |                  |           |    |     |    |            |
|-----|-----|------------------|-----------|----|-----|----|------------|
| C11 | Ba1 | C11 <sup>9</sup> | 148.77(3) | S3 | Sb1 | S1 | 110.99(10) |
| S1  | Sb1 | S4               | 107.91(9) | S3 | Sb1 | S2 | 113.22(10) |
| S2  | Sb1 | S1               | 106.94(9) | S3 | Sb1 | S4 | 110.51(10) |
| S2  | Sb1 | S4               | 107.01(9) |    |     |    |            |

<sup>1</sup>+X,1/2-Y,-1/2+Z; <sup>2</sup>1+X,1/2-Y,-1/2+Z; <sup>3</sup>1+X,+Y,+Z; <sup>4</sup>1-X,-Y,1-Z; <sup>5</sup>1-X,1-Y,1-Z; <sup>6</sup>1-X,-1/2+Y,3/2-Z;  
<sup>7</sup>1-X,-Y,2-Z; <sup>8</sup>+X,1/2-Y,1/2+Z; <sup>9</sup>-X,-1/2+Y,3/2-Z; <sup>10</sup>-1+X,+Y,+Z; <sup>11</sup>-1+X, 1/2-Y,1/2+Z; <sup>12</sup>1-  
X,1/2+Y,3/2-Z; <sup>13</sup>-X,1/2+Y,3/2-Z

**Table S15.** Structural features of thioantimonates.

|    | Compound                                                        | Crystal System | Space Group                                          | Structural units                                                         |
|----|-----------------------------------------------------------------|----------------|------------------------------------------------------|--------------------------------------------------------------------------|
| 1  | Cs <sub>3</sub> SbS <sub>4</sub>                                | Orthorhombic   | <i>Pnma</i>                                          | <sup>a</sup> [SbS <sub>4</sub> ]                                         |
| 2  | Cs <sub>3</sub> SbSe <sub>4</sub>                               | Orthorhombic   | <i>Pnma</i>                                          | <sup>a</sup> [SbS <sub>4</sub> ]                                         |
| 3  | K <sub>3</sub> SbS <sub>4</sub>                                 | Orthorhombic   | <i>Cmc2</i> <sub>1</sub>                             | <sup>a</sup> [SbS <sub>4</sub> ]                                         |
| 4  | K <sub>3</sub> SbSe <sub>4</sub>                                | Trigonal       | <i>R3c</i>                                           | <sup>a</sup> [SbS <sub>4</sub> ]                                         |
| 5  | Na <sub>3</sub> SbS <sub>4</sub>                                | Tetragonal     | <i>P</i> <sup>̄</sup> <i>4</i> <sub>2</sub> <i>c</i> | <sup>a</sup> [SbS <sub>4</sub> ]                                         |
| 6  | Na <sub>3</sub> SbSe <sub>4</sub>                               | Tetragonal     | <i>P</i> <sup>̄</sup> <i>4</i> <sub>2</sub> <i>c</i> | <sup>a</sup> [SbS <sub>4</sub> ]                                         |
| 7  | Rb <sub>3</sub> SbS <sub>4</sub>                                | Orthorhombic   | <i>Pnma</i>                                          | <sup>a</sup> [SbS <sub>4</sub> ]                                         |
| 8  | Rb <sub>3</sub> SbSe <sub>4</sub>                               | Orthorhombic   | <i>Pnma</i>                                          | <sup>a</sup> [SbS <sub>4</sub> ]                                         |
| 9  | Cu <sub>3</sub> SbS <sub>4</sub>                                | Tetragonal     | <i>I</i> <sup>̄</sup> <i>4</i> <i>m</i>              | <sup>a</sup> [SbS <sub>4</sub> ]                                         |
| 10 | Cu <sub>3</sub> SbSe <sub>4</sub>                               | Tetragonal     | <i>I</i> <sup>̄</sup> <i>4</i> <i>m</i>              | <sup>a</sup> [SbS <sub>4</sub> ]                                         |
| 11 | Ag <sub>2</sub> KSbS <sub>4</sub>                               | Tetragonal     | <i>I</i> <sup>̄</sup> <i>4</i> <i>m</i>              | <sup>a</sup> [SbS <sub>4</sub> ]                                         |
| 12 | K <sub>2</sub> AgSbS <sub>4</sub>                               | Orthorhombic   | <i>Pnn2</i>                                          | <sup>a</sup> [SbS <sub>4</sub> ]                                         |
| 13 | Cs <sub>2</sub> AgSbS <sub>4</sub>                              | Triclinic      | <i>P</i> <sup>̄</sup> <i>1</i>                       | <sup>a</sup> [SbS <sub>4</sub> ]                                         |
| 14 | Ag <sub>2</sub> RbSbS <sub>4</sub>                              | Trigonal       | <i>P3</i> <sub>2</sub> <i>2</i> <i>1</i>             | <sup>a</sup> [SbS <sub>4</sub> ]                                         |
| 15 | Rb <sub>2</sub> AgSbS <sub>4</sub>                              | Monoclinic     | <i>P2</i> <sub>1</sub> / <i>c</i>                    | <sup>a</sup> [SbS <sub>4</sub> ]                                         |
| 16 | Rb <sub>2</sub> AuSbS <sub>4</sub>                              | Orthorhombic   | <i>Pbcm</i>                                          | <sup>a</sup> [SbS <sub>4</sub> ]                                         |
| 17 | Cs <sub>3</sub> Ag <sub>2</sub> Sb <sub>3</sub> S <sub>8</sub>  | Monoclinic     | <i>P2</i> <sub>1</sub> / <i>m</i>                    | <sup>a</sup> [SbS <sub>4</sub> ] [SbS <sub>3</sub> ]                     |
| 18 | K <sub>2</sub> Sb <sub>4</sub> S <sub>7</sub>                   | Monoclinic     | <i>C2</i> / <i>c</i>                                 | <sup>b</sup> [SbS <sub>4</sub> ] [SbS <sub>3</sub> ]                     |
| 19 | NaSbS <sub>2</sub>                                              | Cubic          | <i>Fm</i> <sup>̄</sup> <i>3m</i>                     | <sup>b</sup> [SbS <sub>4</sub> ]                                         |
| 20 | KSbS <sub>2</sub>                                               | Monoclinic     | <i>C2</i> / <i>c</i>                                 | <sup>b</sup> [SbS <sub>4</sub> ]                                         |
| 21 | RbSbS <sub>2</sub>                                              | Triclinic      | <i>P</i> <sup>̄</sup> <i>1</i>                       | <sup>b</sup> [SbS <sub>4</sub> ] [SbS <sub>3</sub> ]                     |
| 22 | K <sub>3</sub> SbS <sub>3</sub>                                 | Cubic          | <i>P2</i> <sub>1</sub> <i>3</i>                      | [SbS <sub>3</sub> ]                                                      |
| 23 | Na <sub>3</sub> SbS <sub>3</sub>                                | Cubic          | <i>P2</i> <sub>1</sub> <i>3</i>                      | [SbS <sub>3</sub> ]                                                      |
| 24 | Cs <sub>2</sub> Sb <sub>4</sub> S <sub>7</sub>                  | Monoclinic     | <i>P2</i> <sub>1</sub> / <i>c</i>                    | <sup>b</sup> [SbS <sub>4</sub> ] [SbS <sub>3</sub> ]                     |
| 25 | Rb <sub>2</sub> Sb <sub>4</sub> S <sub>7</sub>                  | Cubic          | <i>P2</i> <sub>1</sub> <i>3</i>                      | <sup>b</sup> [SbS <sub>4</sub> ] [SbS <sub>3</sub> ]                     |
| 26 | CsSbS <sub>2</sub>                                              | Monoclinic     | <i>P2</i> <sub>1</sub> / <i>c</i>                    | [SbS <sub>3</sub> ]                                                      |
| 27 | Cs <sub>4</sub> Sb <sub>14</sub> S <sub>23</sub>                | Triclinic      | <i>P</i> <sup>̄</sup> <i>1</i>                       | <sup>b</sup> [SbS <sub>4</sub> ] [SbS <sub>3</sub> ]                     |
| 28 | Cs <sub>2</sub> Sb <sub>8</sub> S <sub>13</sub>                 | Triclinic      | <i>P</i> <sup>̄</sup> <i>1</i>                       | <sup>b</sup> [SbS <sub>4</sub> ] [SbS <sub>3</sub> ]                     |
| 29 | Ba <sub>8</sub> Sb <sub>6</sub> S <sub>17</sub>                 | Monoclinic     | <i>P2</i> / <i>c</i>                                 | <sup>b</sup> [SbS <sub>4</sub> ] [SbS <sub>3</sub> ]                     |
| 30 | Ca <sub>2</sub> Sb <sub>2</sub> S <sub>5</sub>                  | Monoclinic     | <i>P2</i> <sub>1</sub> / <i>c</i>                    | [SbS <sub>3</sub> ]                                                      |
| 31 | Sr <sub>3</sub> Sb <sub>4</sub> S <sub>9</sub>                  | Orthorhombic   | <i>Pna2</i> <sub>1</sub>                             | [SbS <sub>3</sub> ] [SbS <sub>5</sub> ]                                  |
| 32 | Li <sub>1.5</sub> Sb <sub>5.5</sub> S <sub>9</sub>              | Triclinic      | <i>P</i> <sup>̄</sup> <i>1</i>                       | <sup>b</sup> [SbS <sub>4</sub> ] [SbS <sub>5</sub> ]                     |
| 33 | LiSbS <sub>2</sub>                                              | Trigonal       | <i>R</i> <sup>̄</sup> <i>3</i>                       | <sup>b</sup> [SbS <sub>4</sub> ]                                         |
| 34 | BaSb <sub>2</sub> S <sub>4</sub>                                | Monoclinic     | <i>P2</i> <sub>1</sub> / <i>c</i>                    | <sup>b</sup> [SbS <sub>4</sub> ] [SbS <sub>3</sub> ]                     |
| 35 | KHgSbS <sub>3</sub>                                             | Monoclinic     | <i>C2</i> / <i>c</i>                                 | [SbS <sub>3</sub> ]                                                      |
| 36 | Cs <sub>3</sub> Sb <sub>5</sub> S <sub>9</sub>                  | Monoclinic     | <i>C2</i> / <i>m</i>                                 | [SbS <sub>3</sub> ] [SbS <sub>6</sub> ]                                  |
| 37 | Na <sub>2</sub> CuSbS <sub>3</sub>                              | Monoclinic     | <i>P2</i> <sub>1</sub> / <i>c</i>                    | [SbS <sub>3</sub> ]                                                      |
| 38 | Rb <sub>2</sub> Au <sub>6</sub> Sb <sub>4</sub> S <sub>10</sub> | Orthorhombic   | <i>Pnnm</i>                                          | <sup>b</sup> [SbS <sub>4</sub> ] [SbS <sub>3</sub> ]                     |
| 39 | RbU <sub>2</sub> SbS <sub>8</sub>                               | Monoclinic     | <i>Cm</i>                                            | <sup>b</sup> [SbS <sub>4</sub> ]                                         |
| 40 | KSb <sub>5</sub> S <sub>8</sub>                                 | Monoclinic     | <i>Pc</i>                                            | <sup>b</sup> [SbS <sub>4</sub> ] [SbS <sub>5</sub> ] [SbS <sub>3</sub> ] |

|    |                                                             |              |              |                                     |
|----|-------------------------------------------------------------|--------------|--------------|-------------------------------------|
| 41 | $\text{Sr}_6\text{Sb}_6\text{S}_{17}$                       | Orthorhombic | $P2_12_12_1$ | $[\text{SbS}_3]$                    |
| 42 | $\text{Ba}_{2.605}\text{Pb}_{1.39}\text{Sb}_4\text{S}_{10}$ | Monoclinic   | $P2_1$       | ${}^b[\text{SbS}_4] [\text{SbS}_3]$ |
| 43 | $\text{Na}_9\text{Gd}_5\text{Sb}_8\text{S}_{26}$            | Orthorhombic | $Pnma$       | ${}^b[\text{SbS}_4] [\text{SbS}_3]$ |
| 44 | $\text{KSbP}_2\text{S}_6$                                   | Monoclinic   | $P2_1$       | ${}^b[\text{SbS}_4]$                |
| 45 | $\text{KLa}_2\text{Sb}_3\text{S}_9$                         | Orthorhombic | $P2_12_12_1$ | $[\text{SbS}_5]$                    |
| 46 | $\text{Li}_5\text{SbS}_3\text{I}_2$                         | Orthorhombic | $Pnmm$       | $[\text{SbS}_3]$                    |
| 47 | $\text{CsAgSb}_4\text{S}_7$                                 | Monoclinic   | $C2/c$       | ${}^b[\text{SbS}_4] [\text{SbS}_3]$ |
| 48 | $\text{K}_2\text{CuSbS}_3$                                  | Monoclinic   | $P2_1/c$     | $[\text{SbS}_3]$                    |
| 49 | $\text{NaSbP}_2\text{S}_6$                                  | Monoclinic   | $P2_1/c$     | $[\text{SbS}_5]$                    |
| 50 | $\text{KAg}_2\text{SbS}_3$                                  | Triclinic    | $P\bar{1}$   | $[\text{SbS}_3]$                    |
| 51 | $\text{K}_2\text{Ag}_3\text{Sb}_3\text{S}_7$                | Orthorhombic | $Cmc2_1$     | $[\text{SbS}_3]$                    |
| 52 | $\text{BaSbBS}_4$                                           | Orthorhombic | $Pnma$       | $[\text{SbS}_3]$                    |
| 53 | $\text{K}_3\text{Ag}_9\text{Sb}_4\text{S}_{12}$             | Tetragonal   | $P4_2/n$     | $[\text{SbS}_3]$                    |
| 54 | $\text{Cs}_3\text{Ag}_9\text{Sb}_4\text{S}_{12}$            | Tetragonal   | $P4_2/n$     | $[\text{SbS}_3]$                    |
| 55 | $\text{Rb}_3\text{Ag}_9\text{Sb}_4\text{S}_{12}$            | Tetragonal   | $P4_2/n$     | $[\text{SbS}_3]$                    |
| 56 | $\text{Ba}_2\text{SbFeS}_5$                                 | Orthorhombic | $Pnma$       | $[\text{SbS}_3]$                    |
| 57 | $\text{NaCdSbS}_3$                                          | Monoclinic   | $C2/c$       | $[\text{SbS}_3]$                    |
| 58 | $\text{Ba}_{23}\text{Ga}_8\text{Sb}_2\text{S}_{38}$         | Orthorhombic | $Cmc2_1$     | $[\text{SbS}_3]$                    |
| 59 | $\text{Li}_3\text{SbS}_3$                                   | Orthorhombic | $Pna2_1$     | $[\text{SbS}_3]$                    |
| 60 | $\text{Ba}_2\text{Sb}_4\text{GeS}_{10}$                     | Tetragonal   | $P4_2/mbc$   | $[\text{SbS}_3] [\text{SbS}_5]$     |
| 61 | $\text{Ba}_2\text{SbGaS}_5$                                 | Orthorhombic | $Pnma$       | $[\text{SbS}_3]$                    |
| 62 | $\text{Cs}_3\text{SbS}_3$                                   | Cubic        | $P2_13$      | $[\text{SbS}_3]$                    |
| 63 | $\text{Rb}_3\text{SbS}_3$                                   | Cubic        | $P2_13$      | $[\text{SbS}_3]$                    |
| 64 | $\text{Rb}_6\text{U}_3\text{Sb}_2\text{P}_8\text{S}_{32}$   | Trigonal     | $R\bar{3}c$  | $[\text{SbS}_3]$                    |
| 65 | $\text{Cs}_6\text{U}_3\text{Sb}_2\text{P}_8\text{S}_{32}$   | Trigonal     | $R\bar{3}c$  | $[\text{SbS}_3]$                    |
| 66 | $\text{Cs}_2\text{Cu}_2\text{Sb}_2\text{S}_5$               | Triclinic    | $P\bar{1}$   | $[\text{SbS}_3]$                    |
| 67 | $\text{Ba}_6\text{B}_3\text{SbS}_{12}$                      | Monoclinic   | $P2_1/c$     | $[\text{SbS}_3]$                    |
| 68 | $\text{Ba}_3\text{BSbS}_6$                                  | Hexagonal    | $P\bar{6}2m$ | $[\text{SbS}_3]$                    |
| 69 | $\text{BaAgSbS}_3$                                          | Monoclinic   | $C2/c$       | $[\text{SbS}_3]$                    |
| 70 | $\text{K}_2\text{Sb}_2\text{Sn}_3\text{S}_{10}$             | Monoclinic   | $P2_1/c$     | $[\text{SbS}_3]$                    |
| 71 | $\text{Rb}_2\text{Sb}_2\text{Sn}_3\text{S}_{10}$            | Monoclinic   | $P2_1/c$     | $[\text{SbS}_3]$                    |
| 72 | $\text{Cs}_2\text{Sb}_2\text{Sn}_3\text{S}_{10}$            | Monoclinic   | $P2_1/c$     | $[\text{SbS}_3]$                    |
| 73 | $\text{Ba}_3\text{Sb}_2\text{S}_7$                          | Monoclinic   | $C2/c$       | $[\text{SbS}_3]$                    |
| 74 | $\text{Li}_{17}\text{Sb}_{13}\text{S}_{28}$                 | Monoclinic   | $C2/m$       | $[\text{SbS}_3] [\text{SbS}_5]$     |
| 75 | $\text{RbCuSb}_2\text{S}_4$                                 | Monoclinic   | $C2/c$       | ${}^b[\text{SbS}_4]$                |
| 76 | $\text{CsCuSb}_2\text{S}_4$                                 | Monoclinic   | $C2/c$       | ${}^b[\text{SbS}_4]$                |
| 77 | $\text{KCu}_2\text{SbS}_3$                                  | Triclinic    | $P\bar{1}$   | $[\text{SbS}_3]$                    |
| 78 | $\text{Ba}_2\text{AlSbS}_5$                                 | Orthorhombic | $Pnma$       | $[\text{SbS}_3]$                    |
| 79 | $\text{Cs}_2\text{HgSb}_4\text{S}_8$                        | Triclinic    | $P\bar{1}$   | $[\text{SbS}_3]$                    |
| 80 | $\text{Na}_7\text{HgSb}_5\text{S}_{12}$                     | Trigonal     | $R\bar{3}$   | ${}^b[\text{SbS}_4]$                |
| 81 | $\text{Li}_3\text{Sb}_{11}\text{S}_{18}$                    | Triclinic    | $P\bar{1}$   | $[\text{SbS}_3]$                    |
| 82 | $\text{NaBaSbS}_3$                                          | Monoclinic   | $P2_1/c$     | $[\text{SbS}_3]$                    |
| 83 | $\text{LiBaSbS}_3$                                          | Orthorhombic | $Pbam$       | $[\text{SbS}_3]$                    |
| 84 | $\text{Rb}_2\text{Ag}_3\text{Sb}_3\text{S}_7$               | Orthorhombic | $Cmc2_1$     | $[\text{SbS}_3]$                    |

|     |                                                                                 |              |                                     |                                                      |
|-----|---------------------------------------------------------------------------------|--------------|-------------------------------------|------------------------------------------------------|
| 85  | Cs <sub>2</sub> Ag <sub>3</sub> Sb <sub>3</sub> S <sub>7</sub>                  | Orthorhombic | <i>Cmc2</i> <sub>1</sub>            | [SbS <sub>3</sub> ]                                  |
| 86  | Na <sub>6</sub> CdSb <sub>4</sub> S <sub>10</sub>                               | Monoclinic   | <i>C2/c</i>                         | <sup>b</sup> [SbS <sub>4</sub> ] [SbS <sub>3</sub> ] |
| 87  | K <sub>2</sub> Ba <sub>3</sub> Cu <sub>2</sub> Sb <sub>2</sub> S <sub>10</sub>  | Monoclinic   | <i>C2/m</i>                         | [SbS <sub>3</sub> ]                                  |
| 88  | Cs <sub>2</sub> Ba <sub>3</sub> Cu <sub>2</sub> Sb <sub>2</sub> S <sub>10</sub> | Monoclinic   | <i>C2/m</i>                         | [SbS <sub>3</sub> ]                                  |
| 89  | Rb <sub>2</sub> Ba <sub>3</sub> Cu <sub>2</sub> Sb <sub>2</sub> S <sub>10</sub> | Monoclinic   | <i>C2/m</i>                         | [SbS <sub>3</sub> ]                                  |
| 90  | CsAg <sub>2</sub> SbS <sub>3</sub>                                              | Triclinic    | <i>P</i> <sub>1</sub>               | [SbS <sub>3</sub> ]                                  |
| 91  | CsSb <sub>5</sub> S <sub>8</sub>                                                | Monoclinic   | <i>P2</i> <sub>1</sub> / <i>c</i>   | <sup>b</sup> [SbS <sub>4</sub> ] [SbS <sub>3</sub> ] |
| 92  | Cs <sub>4</sub> Sb <sub>4</sub> S <sub>8</sub>                                  | Orthorhombic | <i>Pnma</i>                         | [SbS <sub>3</sub> ]                                  |
| 93  | RbSb <sub>5</sub> S <sub>8</sub>                                                | Monoclinic   | <i>Pc</i>                           | <sup>b</sup> [SbS <sub>4</sub> ] [SbS <sub>3</sub> ] |
| 94  | Rb <sub>2</sub> CuSb <sub>7</sub> S <sub>12</sub>                               | Triclinic    | <i>P</i> <sub>1</sub>               | <sup>b</sup> [SbS <sub>4</sub> ] [SbS <sub>3</sub> ] |
| 95  | Rb <sub>2</sub> ZnSb <sub>4</sub> S <sub>8</sub>                                | Triclinic    | <i>P</i> <sub>1</sub>               | [SbS <sub>3</sub> ]                                  |
| 96  | LiSrSbS <sub>3</sub>                                                            | Monoclinic   | <i>P2</i> <sub>1</sub> / <i>c</i>   | [SbS <sub>3</sub> ]                                  |
| 97  | Rb <sub>2</sub> HgSb <sub>4</sub> S <sub>8</sub>                                | Triclinic    | <i>P</i> <sub>1</sub>               | [SbS <sub>3</sub> ]                                  |
| 98  | Cs <sub>2</sub> ZnSb <sub>2</sub> S <sub>5</sub>                                | Monoclinic   | <i>C2/c</i>                         | [SbS <sub>3</sub> ]                                  |
| 99  | LiSbSe <sub>2</sub>                                                             | Cubic        | <i>Fm</i> <sup>3</sup> <i>m</i>     | [SbS <sub>6</sub> ]                                  |
| 100 | NaSbSe <sub>2</sub>                                                             | Cubic        | <i>Fm</i> <sup>3</sup> <i>m</i>     | [SbS <sub>6</sub> ]                                  |
| 101 | KSbSe <sub>2</sub>                                                              | Triclinic    | <i>P</i> <sub>1</sub>               | <sup>b</sup> [SbS <sub>4</sub> ] [SbS <sub>3</sub> ] |
| 102 | RbSb <sub>3</sub> Se <sub>5</sub>                                               | Orthorhombic | <i>Pnma</i>                         | [SbS <sub>5</sub> ] [SbS <sub>6</sub> ]              |
| 103 | BaSb <sub>2</sub> Se <sub>4</sub>                                               | Monoclinic   | <i>P2</i> <sub>1</sub> / <i>c</i>   | <sup>b</sup> [SbS <sub>4</sub> ] [SbS <sub>3</sub> ] |
| 104 | RbSbSe <sub>2</sub>                                                             | Orthorhombic | <i>Pnmm</i>                         | <sup>b</sup> [SbS <sub>4</sub> ] [SbS <sub>3</sub> ] |
| 105 | Ba <sub>4</sub> Sb <sub>4</sub> Se <sub>11</sub>                                | Triclinic    | <i>P</i> <sub>1</sub>               | [SbS <sub>3</sub> ]                                  |
| 106 | CsSb <sub>2</sub> Se <sub>4</sub>                                               | Triclinic    | <i>P</i> <sub>1</sub>               | <sup>b</sup> [SbS <sub>4</sub> ] [SbS <sub>3</sub> ] |
| 107 | Cs <sub>3</sub> Sb <sub>5</sub> Se <sub>9</sub>                                 | Monoclinic   | <i>C2/m</i>                         | [SbS <sub>3</sub> ] [SbS <sub>6</sub> ]              |
| 108 | K <sub>2</sub> Sb <sub>4</sub> Se <sub>8</sub>                                  | Triclinic    | <i>P</i> <sub>1</sub>               | <sup>b</sup> [SbS <sub>4</sub> ] [SbS <sub>3</sub> ] |
| 109 | Rb <sub>2</sub> Sb <sub>4</sub> Se <sub>8</sub>                                 | Triclinic    | <i>P</i> <sub>1</sub>               | <sup>b</sup> [SbS <sub>4</sub> ] [SbS <sub>3</sub> ] |
| 110 | KU <sub>2</sub> SbSe <sub>8</sub>                                               | Monoclinic   | <i>Cm</i>                           | <sup>b</sup> [SbS <sub>4</sub> ]                     |
| 111 | Cs <sub>2</sub> Cu <sub>2</sub> Sb <sub>2</sub> Se <sub>5</sub>                 | Triclinic    | <i>P</i> <sub>1</sub>               | [SbS <sub>3</sub> ]                                  |
| 112 | K <sub>2</sub> Gd <sub>2</sub> Sb <sub>2</sub> Se <sub>9</sub>                  | Orthorhombic | <i>Pbam</i>                         | [SbS <sub>5</sub> ]                                  |
| 113 | K <sub>2</sub> Gd <sub>2</sub> Sb <sub>2</sub> Se <sub>9</sub>                  | Monoclinic   | <i>C2/m</i>                         | [SbS <sub>3</sub> ]                                  |
| 114 | RbHgSbSe <sub>3</sub>                                                           | Monoclinic   | <i>P2</i> <sub>1</sub> / <i>c</i>   | [SbS <sub>3</sub> ]                                  |
| 115 | CsHgSbSe <sub>3</sub>                                                           | Orthorhombic | <i>Cmcm</i>                         | [SbS <sub>3</sub> ]                                  |
| 116 | K <sub>3</sub> SbSe <sub>3</sub>                                                | Cubic        | <i>P2</i> <sub>1</sub> <sup>3</sup> | [SbS <sub>3</sub> ]                                  |
| 117 | Rb <sub>3</sub> SbSe <sub>3</sub>                                               | Cubic        | <i>P2</i> <sub>1</sub> <sup>3</sup> | [SbS <sub>3</sub> ]                                  |
| 118 | Cs <sub>3</sub> SbSe <sub>3</sub>                                               | Cubic        | <i>P2</i> <sub>1</sub> <sup>3</sup> | [SbS <sub>3</sub> ]                                  |
| 119 | KHgSbSe <sub>3</sub>                                                            | Orthorhombic | <i>Pnma</i>                         | [SbS <sub>3</sub> ]                                  |
| 120 | KSbP <sub>2</sub> Se <sub>6</sub>                                               | Monoclinic   | <i>P2</i> <sub>1</sub>              | [SbS <sub>3</sub> ]                                  |
| 121 | KSm <sub>2</sub> Sb <sub>3</sub> Se <sub>8</sub>                                | Orthorhombic | <i>Pnma</i>                         | [SbS <sub>3</sub> ] [SbS <sub>5</sub> ]              |
| 122 | Ba <sub>4</sub> LaGe <sub>3</sub> SbSe <sub>13</sub>                            | Monoclinic   | <i>P2</i> <sub>1</sub> / <i>c</i>   | [SbS <sub>3</sub> ]                                  |
| 123 | BaLaSb <sub>2</sub> Se <sub>6</sub>                                             | Monoclinic   | <i>P2</i> <sub>1</sub> / <i>c</i>   | [SbS <sub>3</sub> ]                                  |
| 124 | KCu <sub>2</sub> SbSe <sub>3</sub>                                              | Monoclinic   | <i>P2</i> <sub>1</sub> / <i>c</i>   | [SbS <sub>3</sub> ]                                  |
| 125 | Ba <sub>3</sub> SnSb <sub>2</sub> Se <sub>8</sub>                               | Orthorhombic | <i>Pnma</i>                         | [SbS <sub>5</sub> ]                                  |
| 126 | Na <sub>3</sub> SbSe <sub>3</sub>                                               | Cubic        | <i>P2</i> <sub>1</sub> <sup>3</sup> | [SbS <sub>3</sub> ]                                  |
| 127 | Ba <sub>2</sub> GaSbSe <sub>5</sub>                                             | Orthorhombic | <i>Pnma</i>                         | [SbS <sub>3</sub> ]                                  |
| 128 | Ba <sub>2</sub> InSbSe <sub>5</sub>                                             | Orthorhombic | <i>Cmc2</i> <sub>1</sub>            | [SbS <sub>5</sub> ]                                  |

|     |                                                                   |              |              |                                                      |
|-----|-------------------------------------------------------------------|--------------|--------------|------------------------------------------------------|
| 129 | KBaSbSe <sub>3</sub>                                              | Monoclinic   | $P2_1/c$     | [SbS <sub>3</sub> ]                                  |
| 130 | Ba <sub>3</sub> BSbSe <sub>6</sub>                                | Hexagonal    | $P\bar{6}2m$ | <sup>b</sup> [SbS <sub>4</sub> ] [SbS <sub>3</sub> ] |
| 131 | Ba <sub>3</sub> Sb <sub>2</sub> Se <sub>7</sub>                   | Monoclinic   | $C2/c$       | [SbS <sub>3</sub> ]                                  |
| 132 | Ba <sub>2</sub> Sb <sub>2</sub> Se <sub>5</sub>                   | Orthorhombic | $Pbam$       | [SbS <sub>5</sub> ]                                  |
| 133 | Ba <sub>2</sub> FeSbSe <sub>5</sub>                               | Orthorhombic | $Pnma$       | [SbS <sub>3</sub> ]                                  |
| 134 | Ba <sub>23</sub> Ga <sub>8</sub> Sb <sub>2</sub> Se <sub>38</sub> | Orthorhombic | $Cmc2_1$     | [SbS <sub>3</sub> ]                                  |
| 135 | NaBaSbSe <sub>3</sub>                                             | Monoclinic   | $P2_1/c$     | [SbS <sub>3</sub> ]                                  |
| 136 | LiBaSbSe <sub>3</sub>                                             | Orthorhombic | $Pbam$       | [SbS <sub>3</sub> ]                                  |
| 137 | Na <sub>3</sub> CdSbSe <sub>4</sub>                               | Monoclinic   | $P2_1/c$     | [SbS <sub>3</sub> ]                                  |
| 138 | Ba <sub>4</sub> NbSbSe <sub>12</sub>                              | Triclinic    | $P\bar{1}$   | [SbS <sub>3</sub> ]                                  |
| 139 | Ba <sub>4</sub> TaSbSe <sub>12</sub>                              | Triclinic    | $P\bar{1}$   | [SbS <sub>3</sub> ]                                  |
| 140 | Ba <sub>10</sub> Fe <sub>3</sub> Sb <sub>7</sub> Se <sub>24</sub> | Orthorhombic | $Cmc2_1$     | <sup>b</sup> [SbS <sub>4</sub> ] [SbS <sub>3</sub> ] |
| 141 | Ba <sub>4</sub> GeSb <sub>2</sub> Se <sub>11</sub>                | Orthorhombic | $Cmc2_1$     | [SbS <sub>3</sub> ]                                  |
| 142 | Ba <sub>2</sub> AsSbSe <sub>5</sub>                               | Monoclinic   | $P2_1$       | [SbS <sub>3</sub> ] [SbS <sub>5</sub> ]              |
| 143 | Ba <sub>3</sub> KSb <sub>4</sub> S <sub>9</sub> Cl                | Orthorhombic | $Pnmm$       | [SbS <sub>3</sub> ] [SbS <sub>5</sub> ]              |
| 144 | Ba <sub>4</sub> Sb <sub>3</sub> S <sub>8</sub> Cl                 | Monoclinic   | $P2_1/c$     | <sup>b</sup> [SbS <sub>4</sub> ] [SbS <sub>3</sub> ] |
| 145 | Ba <sub>2</sub> SbS <sub>3</sub> I                                | Orthorhombic | $Pnma$       | [SbS <sub>3</sub> ]                                  |
| 146 | LiBa <sub>3</sub> SbS <sub>6</sub> C <sub>12</sub>                | Monoclinic   | $C2/m$       | [SbS <sub>3</sub> ]                                  |
| 147 | Ba <sub>2</sub> Sb <sub>2</sub> Se <sub>4</sub> F <sub>2</sub>    | Triclinic    | $P\bar{1}$   | [SbS <sub>3</sub> ]                                  |
| 148 | Sr <sub>2</sub> Sb <sub>2</sub> Se <sub>4</sub> F <sub>2</sub>    | Tetragonal   | $P4/nmm$     | [SbS <sub>5</sub> ]                                  |

<sup>a</sup>[SbS<sub>4</sub>]: Regular tetrahedron, <sup>b</sup>[SbS<sub>4</sub>]: Seesaw tetrahedron.

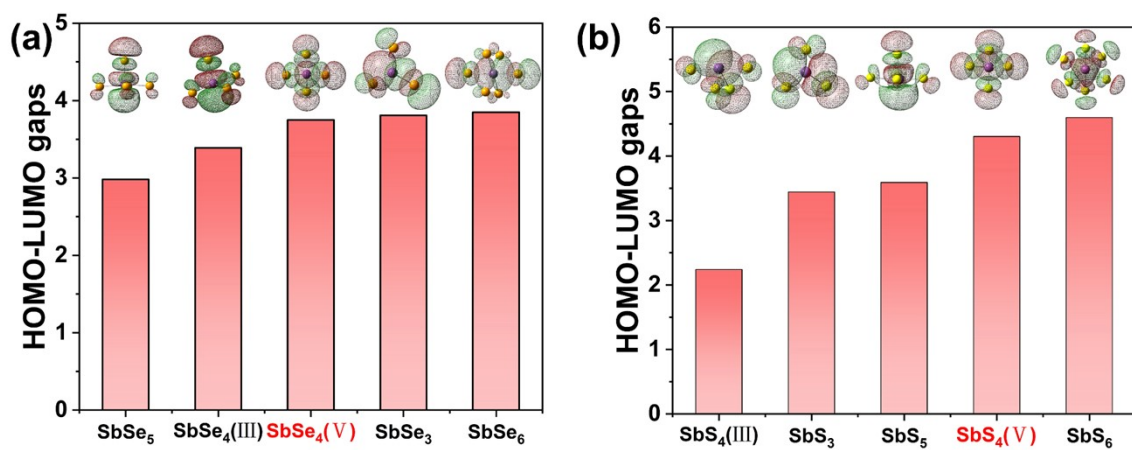

Figure S1. The calculated HOMO-LUMO gaps.

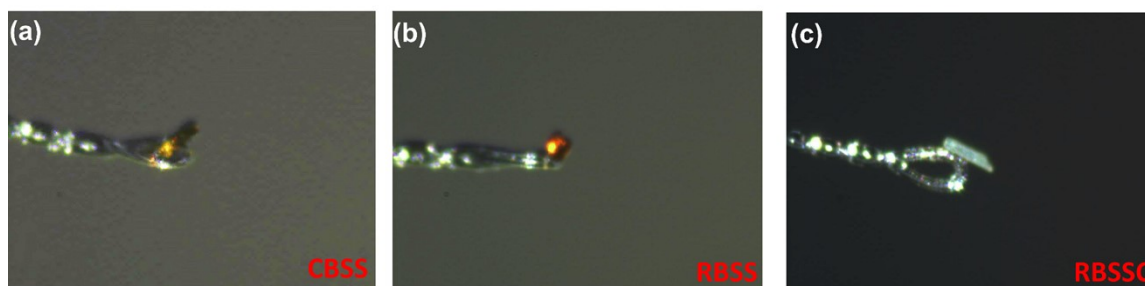

**Figure S2.** (a-c) They are used respectively to collect crystal photographs of CBSS, RBSS, and RBSSC single crystal X-ray data.



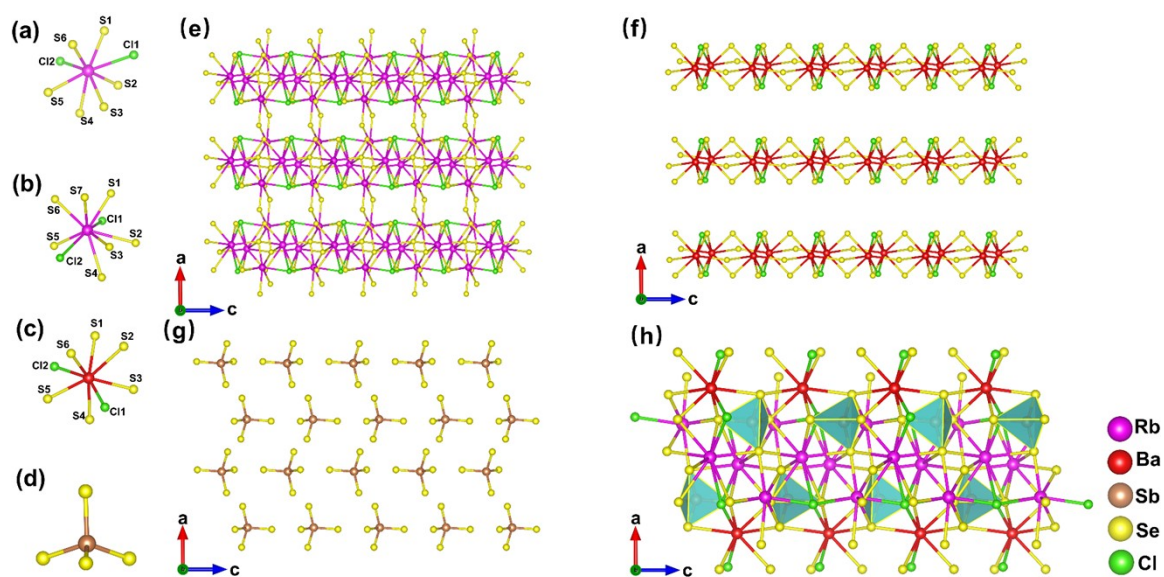

**Figure S3.** (a-d) Coordination patterns among Rb atoms, Ba atoms, and Sb atoms. (e) The two-dimensional layer formed by the sharing of S atoms between [RbS<sub>6</sub>Cl<sub>2</sub>] and [RbS<sub>7</sub>Cl<sub>2</sub>] units. (f) Two opposing infinite chains of [BaS<sub>5</sub>Cl<sub>2</sub>]. (g) The RBSSC structures contain isolated [SbS<sub>4</sub>] tetrahedra. (h) Crystal structure of RBSSC along the b-axis.

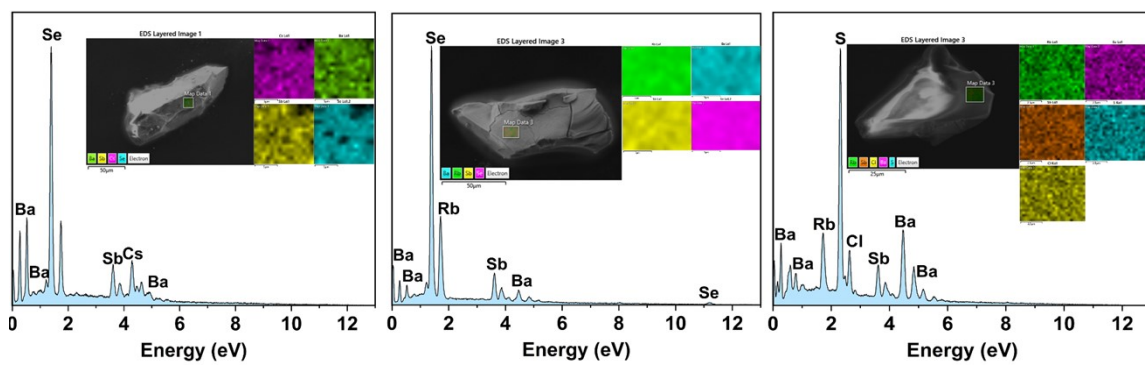

**Figure S4.** X-ray energy dispersive spectrum of CBSS, RBSS and RBSSC crystals.

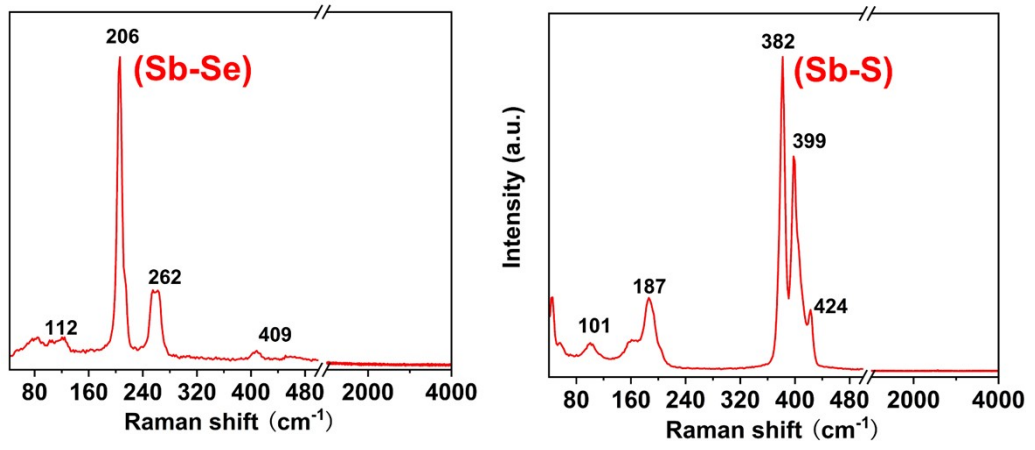

**Figure S5.** The Raman spectroscopy of RBSS and RBSSC.

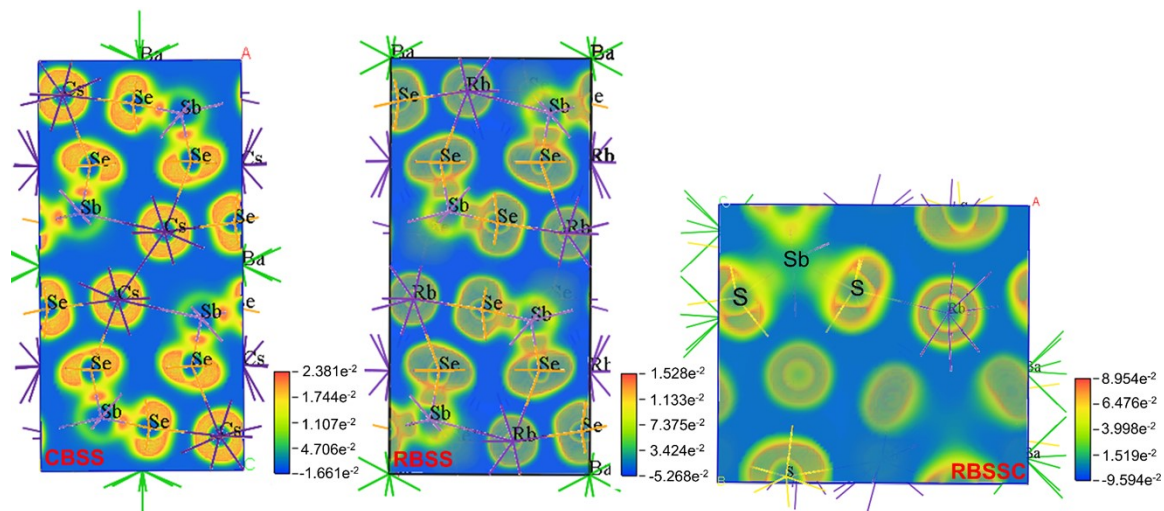

**Figure S6.** The electron localization function (ELF) for RBSS, RBSS and RBSSC.

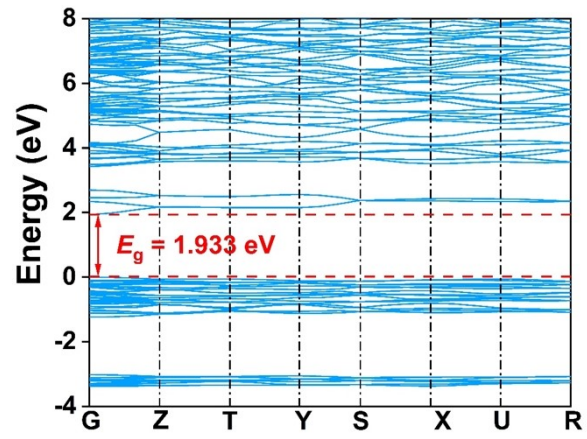

**Figure S7.** Calculate the GGA band gap of Cs<sub>3</sub>SbSe<sub>4</sub> compound.

## References:

1. L. H. Nicholls, F. J. Rodríguez-Fortuño, M. E. Nasir, R. M. Córdova-Castro, N. Olivier, G. A. Wurtz and A. V. Zayats, Ultrafast synthesis and switching of light polarization in nonlinear anisotropic metamaterials, *Nat. Photonics*, 2017, **11**, 628-633.
2. H. S. Wang, X. T. Pan, W. Zhao, Y. Chu and J. J. Li, A new infrared nonlinear optical material BaZnGeS<sub>4</sub> with a wide band gap and large nonlinear optical response, *Inorg. Chem. Front.*, 2023, **10**, 6253-6261.
3. D. Zhang, Q. Wang, H. Luo, L. L. Cao, X. H. Dong, L. Huang, D. J. Gao and G. H. Zou, Deep eutectic solvents synthesis of A<sub>2</sub>Sb(C<sub>2</sub>O<sub>4</sub>)Cl<sub>3</sub> (A = NH<sub>4</sub>, K, Rb) with superior optical performance, *Adv. Opt. Mater.*, 2023, **11**, 2202874.
4. L. Qi, X. X. Jiang, K. Duanmu, C. Wu, Z. S. Lin, Z. P. Huang, M. G. Humphrey and C. Zhang, Record Second-Harmonic Generation and Birefringence in an Ultraviolet Antimonate by Bond Engineering, *J. Am. Chem. Soc.*, 2024, **146**, 9975-9983.
5. Y. Zhou, L. T. Jiang, X. M. Jiang, B. W. Liu and G. C. Guo, Mixed-anion square-pyramid [SbS<sub>3</sub>I<sub>2</sub>] units causing strong second-harmonic generation intensity and large birefringence, *Chin. Chem. Lett.*, 2024, 109740.
6. L. A. Wang, D. D. Chu, Z. H. Yang, J. J. Li and S. L. Pan, Wide band gap selenide infrared nonlinear optical materials A<sup>II</sup> Mg<sub>6</sub>Ga<sub>6</sub>Se<sub>16</sub> with strong SHG responses and high laser-induced damage thresholds, *Chem. Sci.*, 2024, **15**, 6577-6582.
